# Supplementary material for: In Vitro Erythropoiesis at Different pO2 Induces Adaptations That Are Independent of Prior Systemic Exposure to Hypoxia
Source: MDPI journal article supplement (doi:10.3390/cells11071082), 2022-03-23
Supplement: s1 [file s1]

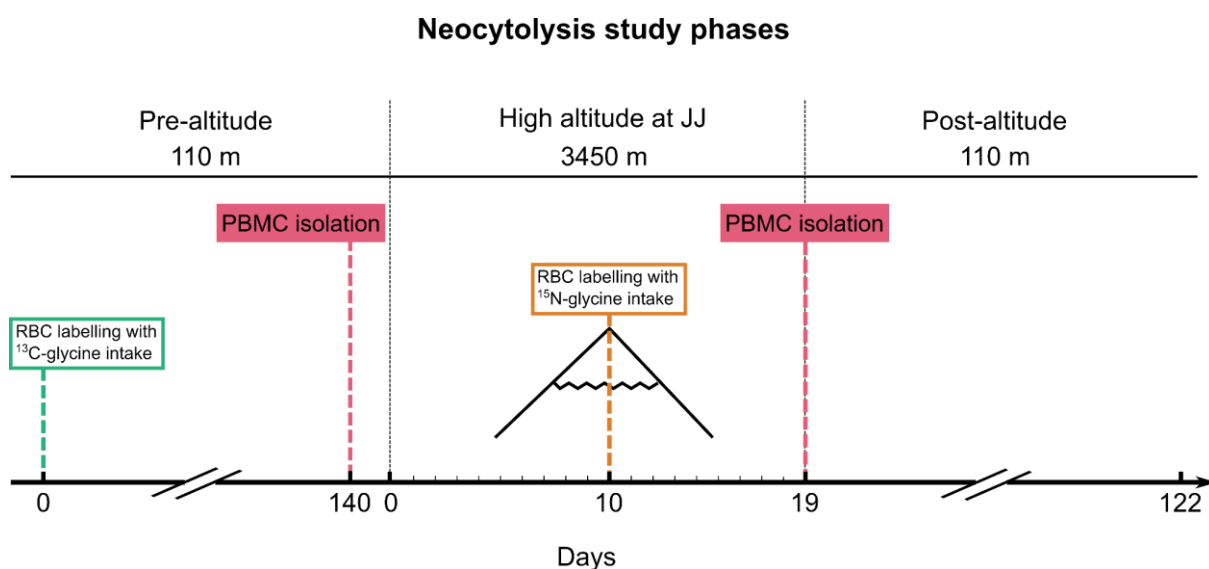

**Figure S1.** Neocytolysis study timeline, divided into three phases: in the pre-altitude phase (day 0) RBC were age-cohort labeled with the isotope  $^{13}\text{C}$ -glycine; a second age-cohort labeling with  $^{15}\text{N}$  was performed at high altitude (day 10). RBC decay was regularly measured by isotope ratio mass spectrometry haem ( $^{13}\text{C}/^{12}\text{C}$  in the pre-altitude phase and  $^{15}\text{N}/^{14}\text{N}$  during high altitude and post-altitude phases) to reveal any difference in RBC lifespan between the two cohorts that could demonstrate the existence of neocytolysis. PBMC collection for *in vitro* erythropoiesis was performed at day 140 pre-altitude and day 19 high altitude (JJ samples). For more information on the study, see Klein et al. [11].

# **A CD71 & CD235 expression during differentiation**

P1: CD71<sup>high</sup> CD235<sup>-</sup>  
P2: CD71<sup>high</sup> CD235<sup>high</sup>  
P3: CD71<sup>med</sup> CD235<sup>high</sup>  
P4: CD71<sup>low</sup> CD235<sup>high</sup>  
P5: CD71<sup>-</sup> CD235<sup>high</sup>

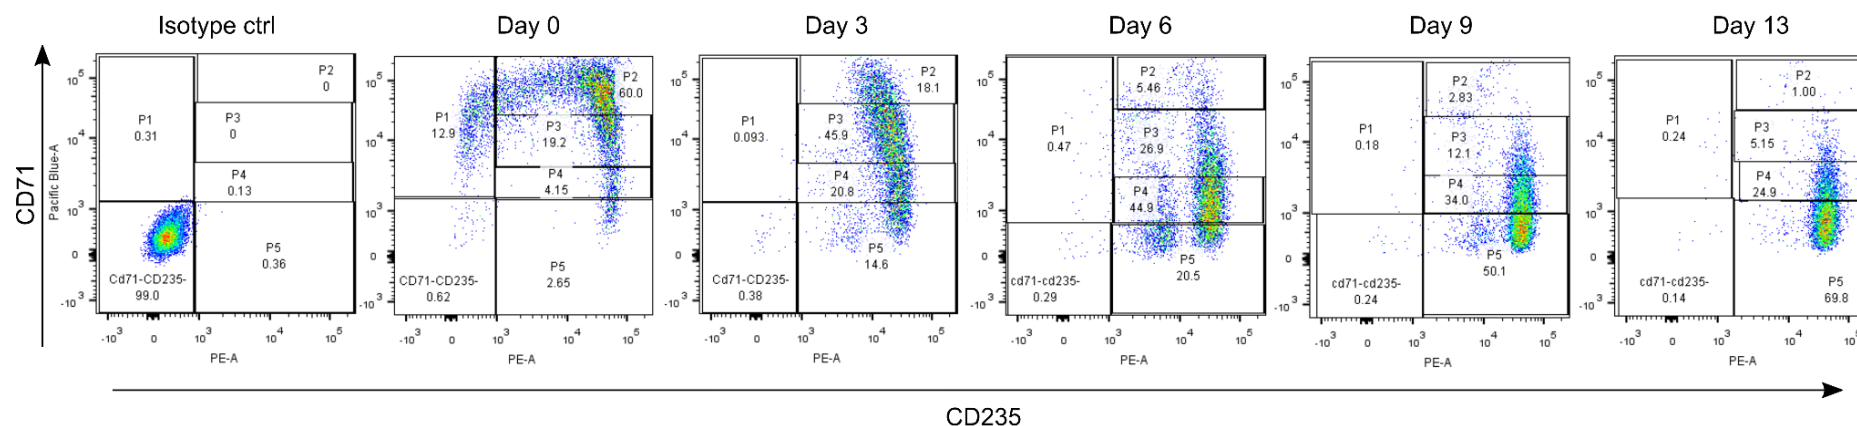

# **B Enucleation throughout differentiation**

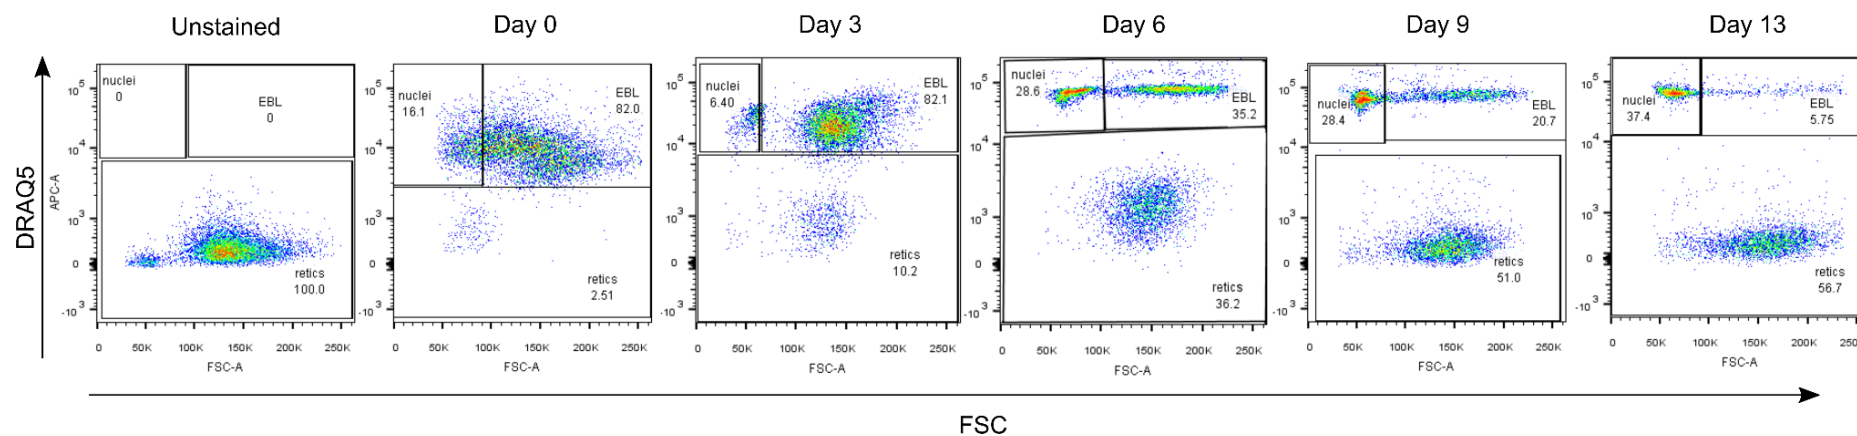

**Figure S2.** Representative flow cytometry dot plot on one donor over differentiation. (A) Population gating of erythroid precursors at different stages of maturation according to the expression of CD71 and CD235. CD71<sup>+</sup>CD235<sup>+</sup> indicate non-erythroid cells. (B) DRAQ5 nuclear staining vs FSC. Positive events refer to nucleated cells (EBL=erythroblasts) and pyrenocytes (nuclei) and negative events to enucleated reticulocytes.

# Donor 1 at 20% O<sub>2</sub>

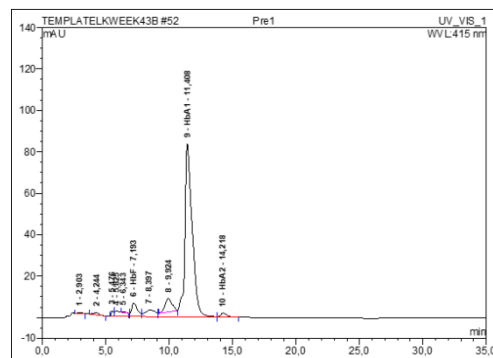

| No.    | Ret.Time min | Peak Name | Rel.Area % |
|--------|--------------|-----------|------------|
| 1      | 2.90         | n.a.      | 0.46       |
| 2      | 4.24         | n.a.      | 0.76       |
| 3      | 5.48         | n.a.      | 0.78       |
| 4      | 5.83         | n.a.      | 3.35       |
| 5      | 6.34         | n.a.      | 0.20       |
| 6      | 7.19         | HbF       | 4.67       |
| 7      | 8.40         | n.a.      | 4.06       |
| 8      | 9.92         | n.a.      | 5.51       |
| 9      | 11.41        | HbA1      | 78.81      |
| 10     | 14.22        | HbA2      | 1.39       |
| Total: |              |           | 100.00     |

# Donor 1 at 3% O<sub>2</sub>

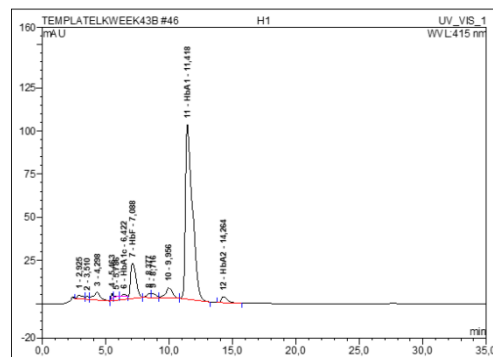

| No.    | Ret.Time min | Peak Name | Rel.Area % |
|--------|--------------|-----------|------------|
| 1      | 2.92         | n.a.      | 1.18       |
| 2      | 3.51         | n.a.      | 0.59       |
| 3      | 4.30         | n.a.      | 3.16       |
| 4      | 5.46         | n.a.      | 0.49       |
| 5      | 5.79         | n.a.      | 0.12       |
| 6      | 6.42         | HbA1c     | 0.50       |
| 7      | 7.09         | HbF       | 14.03      |
| 8      | 8.38         | n.a.      | 0.92       |
| 9      | 8.72         | n.a.      | 1.12       |
| 10     | 9.96         | n.a.      | 4.10       |
| 11     | 11.42        | HbA1      | 71.70      |
| 12     | 14.26        | HbA2      | 2.08       |
| Total: |              |           | 100.00     |

# Donor 1 at 20% O<sub>2</sub> JJ

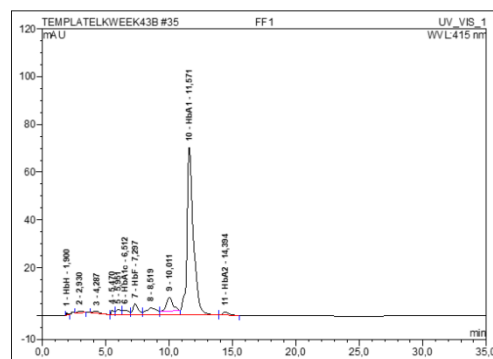

| No.    | Ret.Time min | Peak Name | Rel.Area % |
|--------|--------------|-----------|------------|
| 1      | 1.90         | HbH       | 0.20       |
| 2      | 2.93         | n.a.      | 0.59       |
| 3      | 4.29         | n.a.      | 0.80       |
| 4      | 5.47         | n.a.      | 0.84       |
| 5      | 5.95         | n.a.      | 1.93       |
| 6      | 6.51         | HbA1c     | 1.86       |
| 7      | 7.30         | HbF       | 4.02       |
| 8      | 8.52         | n.a.      | 5.00       |
| 9      | 10.01        | n.a.      | 6.02       |
| 10     | 11.57        | HbA1      | 77.46      |
| 11     | 14.39        | HbA2      | 1.26       |
| Total: |              |           | 100.00     |

**Figure S3.** Representative examples of primary HPLC data. Donor 1 in the three culture conditions.



**Figure S4.** STRING analysis [59] of significantly differentially abundant proteins between the 3% and 20% O<sub>2</sub> cultures. Clusters are defined in figure 6D. Proteins are highlighted in different colors according to their functional group.
